# Supplementary material for: A universal biocompatible coating for enhanced lubrication and bacterial inhibition
Source: Royal Society of Chemistry journal article supplement (doi:10.1039/d2bm00598k), 2022-01-01
Supplement: d2bm00598k1.pdf [file d2bm00598k1.pdf]

## Supporting information

### **A universal biocompatible coating for enhanced lubrication and bacterial inhibition**

Di Suo,<sup>‡a</sup> Jingdong Rao,<sup>‡a</sup> Haimang Wang,<sup>b</sup> Ziheng Zhang,<sup>c,d</sup> Polly Hang-Mei Leung,<sup>e</sup> Hongyu Zhang,<sup>b</sup> Xiaoming Tao,<sup>c,d</sup> Xin Zhao<sup>\*a</sup>

a. Department of Biomedical Engineering, The Hong Kong Polytechnic University, Hung Hom, Kowloon, Hong Kong SAR, China.

b. State Key Laboratory of Tribology, Department of Mechanical Engineering, Tsinghua University, Beijing, 100084, China

c. Institute of Textiles and Clothing, The Hong Kong Polytechnic University, Hung Hom, Kowloon, Hong Kong SAR, China.

d. Research Institute for Intelligent Wearable Systems, The Hong Kong Polytechnic University, Hung Hom, Kowloon, Hong Kong SAR, China

e. Department of Health Technology and Informatics, The Hong Kong Polytechnic University, Hung Hom, Kowloon, Hong Kong SAR, China.

\* Corresponding author: Dr Xin Zhao, E-mail: xin.zhao@polyu.edu.hk.

‡These authors contributed equally.

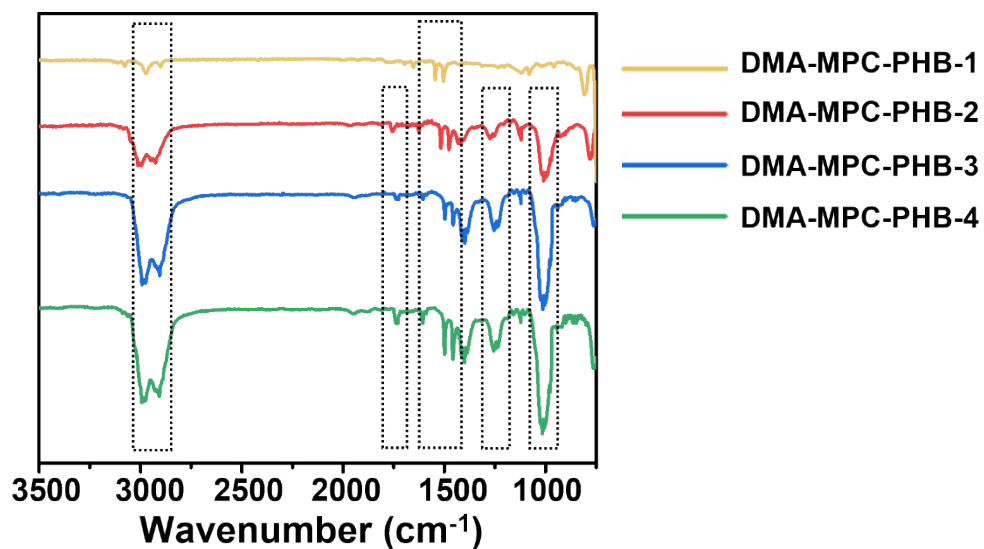

**Fig. S1.** FTIR spectra of DMA-MPC-PHB coating with different feeding mass ratio. DMA-MPC-PHB-1,2,3,4 denote the DMA-MPC-PHB coatings with the mass ratio of DMA:MPC:PHB of 1:1:1, 1:1:2, 1:2:1 and 1:2:2.

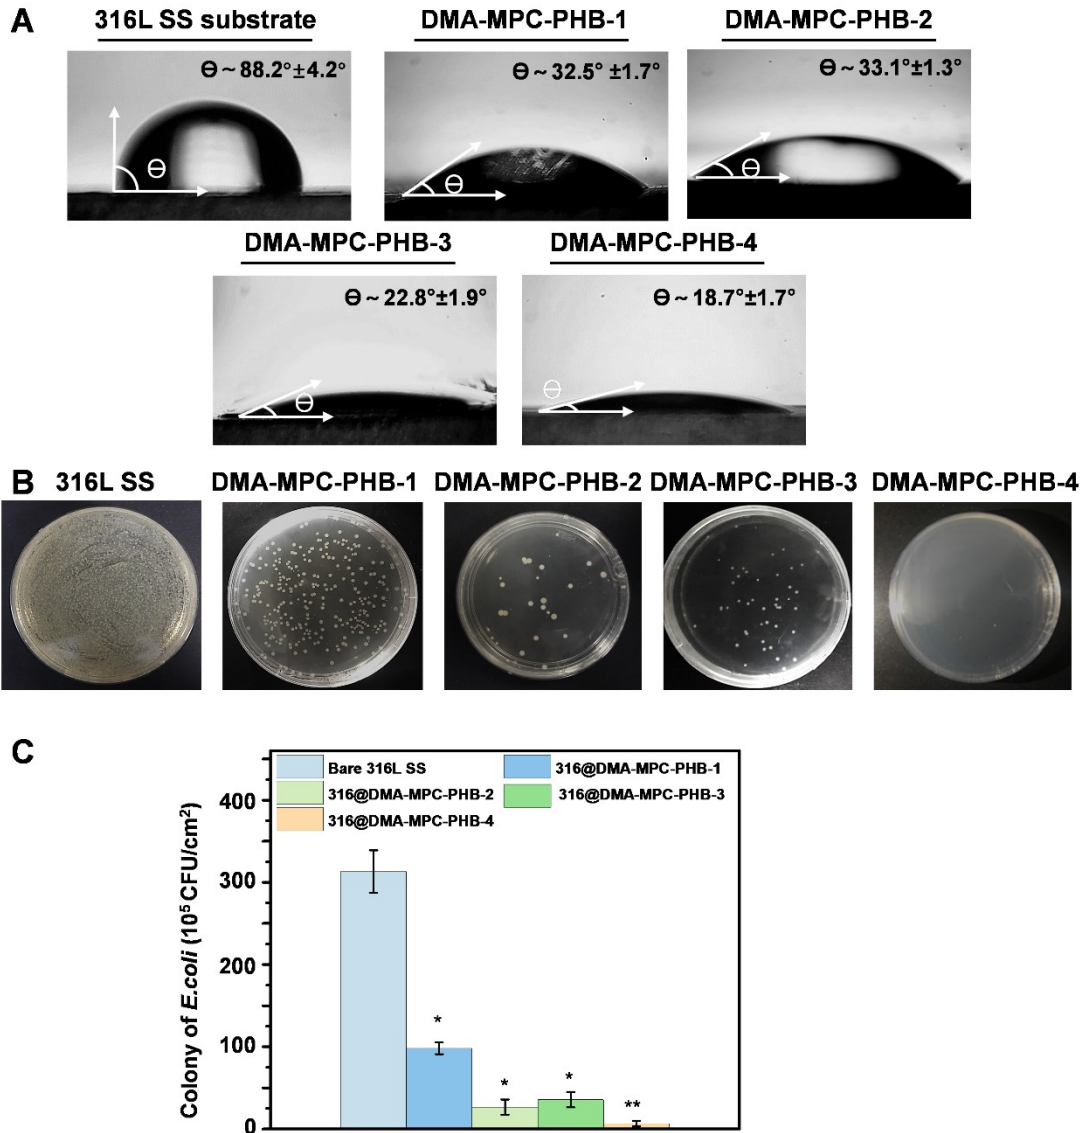

**Fig. S2** (A). Representative water contact angle images of 316L SS substrates and their coated surfaces. (B). Bacterial inhibition property of bare and coated 316L SS. DMA-MPC-PHB-1,2,3,4 denote the DMA-MPC-PHB coatings with the mass ratio of DMA:MPC:PHB of 1:1:1, 1:1:2, 1:2:1 and 1:2:2. (C). Quantification of the colony of *E. coli* on different substrates. Data are presented as mean  $\pm$  SD and analyzed by one-way ANOVA, \* $p < 0.05$ , \*\* $p < 0.01$  (DMA-MPC-PHB coated samples vs bare surface).

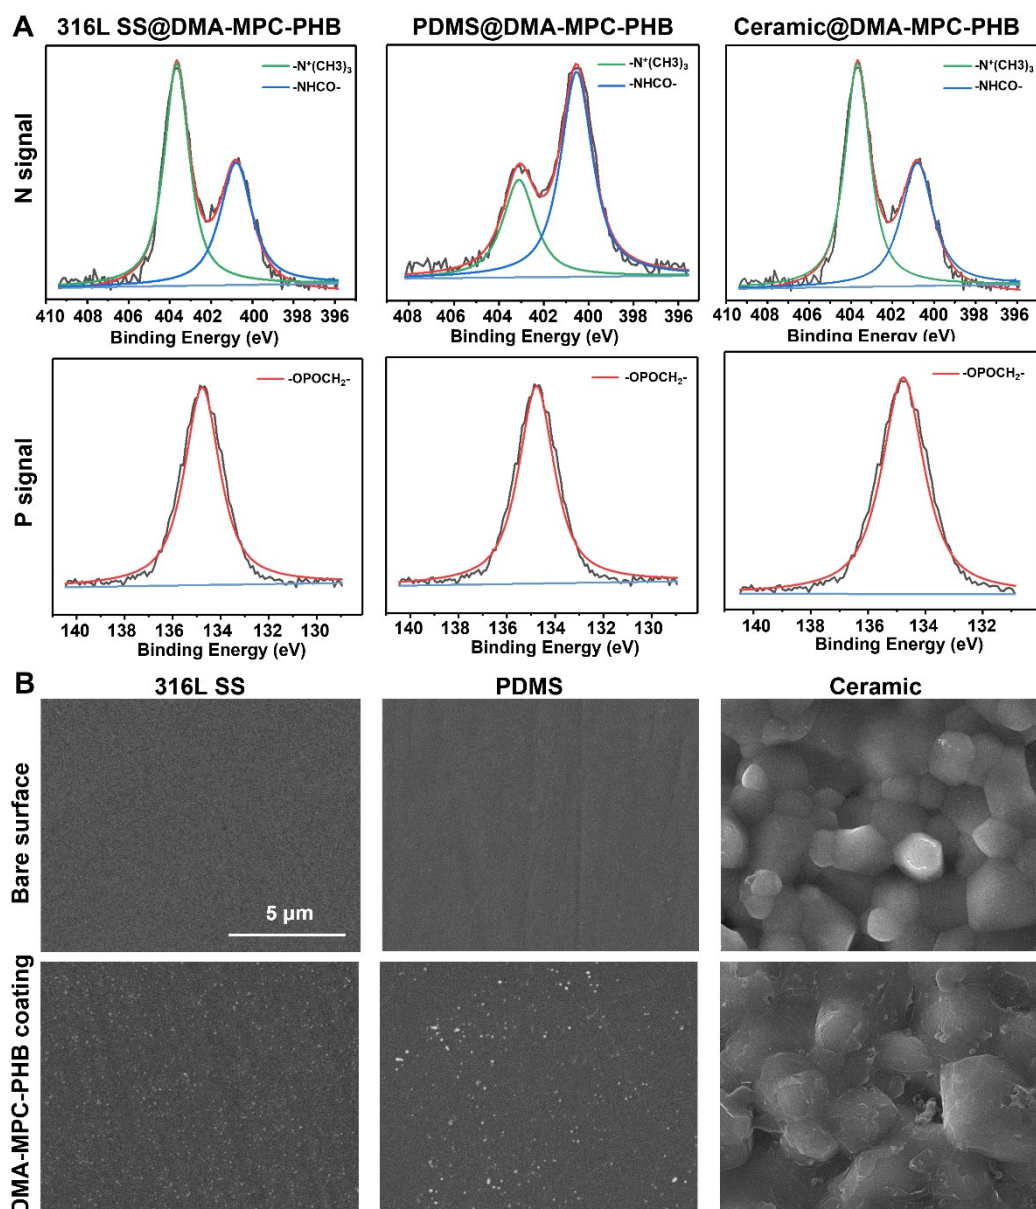

**Fig. S3.** (A). High-resolution narrow XPS narrow spectra of N signal and P signal on DMA-MPC-PHB-coated samples. (B). SEM images of bare and DMA-MPC-PHB-coated 316L/PDMS/ceramic.

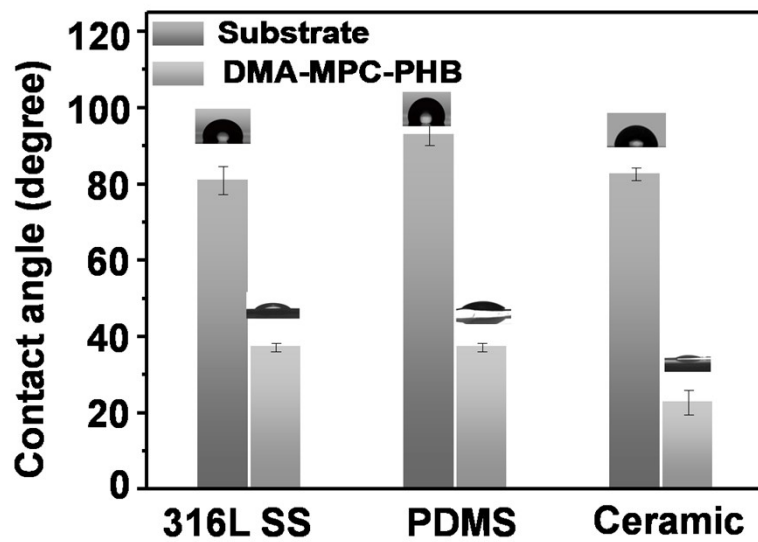

Fig. S4. Water contact angle of bare and terpolymer-coated 316L/PDMS/ceramic.
